# Supplementary material for: Development, implementation and evaluation of high-quality virtual preoperative anaesthetic assessment during COVID-19 and beyond: a quality improvement report
Source: HighWire-hosted journal article supplement (doi:10.1136/bmjoq-2022-001959), 2022-10-01
Supplement: bmjoq-2022-001959supp004_data_supplement.pdf [file bmjoq-2022-001959supp004_data_supplement.pdf]

## Supplemental material: Preoperative anaesthetic assessment process, flowchart

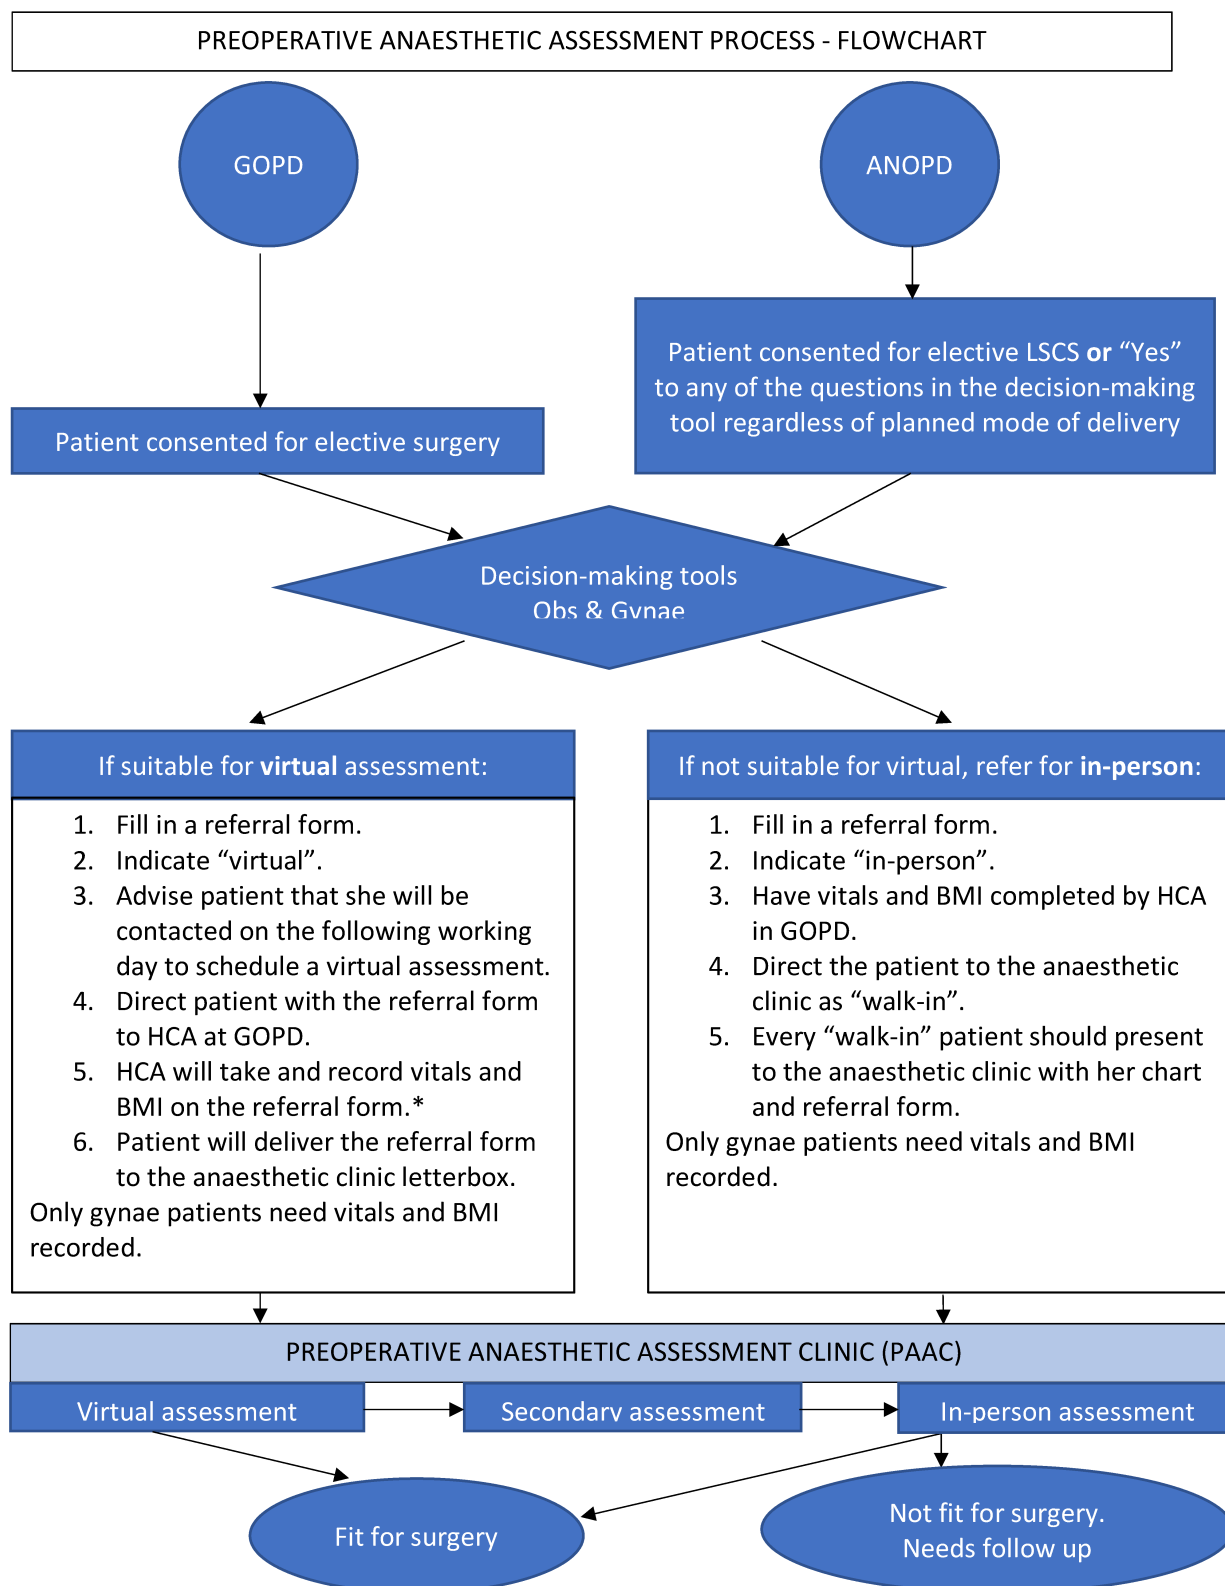

GOPD – Gynaecological Outpatient Department, ANOPD – Antenatal Outpatient Department. Sphere shape indicates start/end point, square shape indicates action point, rhombus shape indicates decision point
